# Supplementary material for: The role of microRNA-155/liver X receptor pathway in experimental and idiopathic pulmonary fibrosis
Source: PubMed Central journal article supplement (PMC5457127; doi:10.1016/j.jaci.2016.09.021), 2017-06

Figure E5

**A** Mouse macrophages

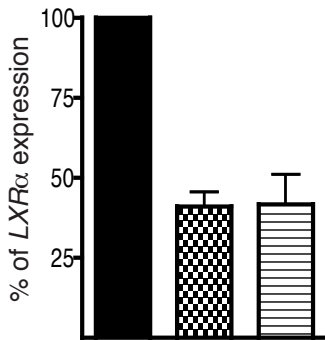

**B** Mouse fibroblasts

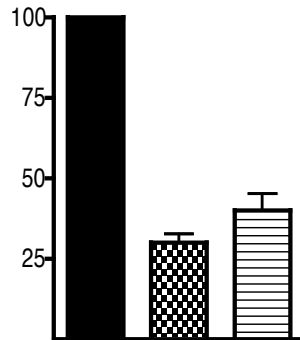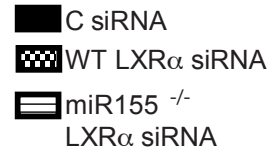

**C** Human macrophages

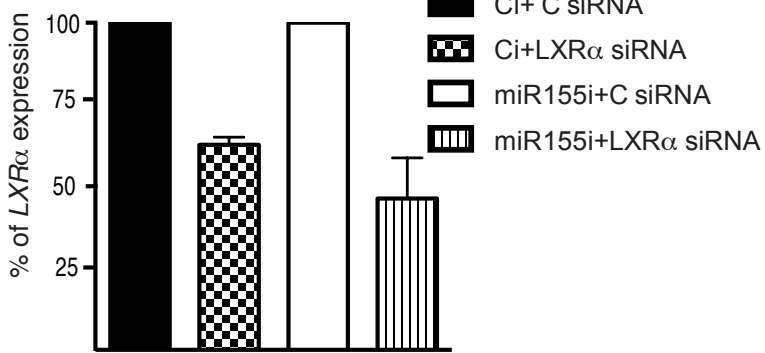

**D** IPF lung fibroblasts

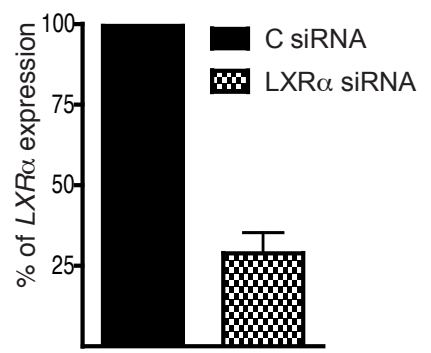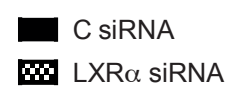

Supplement: mmc7.pdf [file mmc7.pdf]
