# Supplementary material for: The role of microRNA-155/liver X receptor pathway in experimental and idiopathic pulmonary fibrosis
Source: PubMed Central journal article supplement (PMC5457127; doi:10.1016/j.jaci.2016.09.021), 2017-06

Figure E9

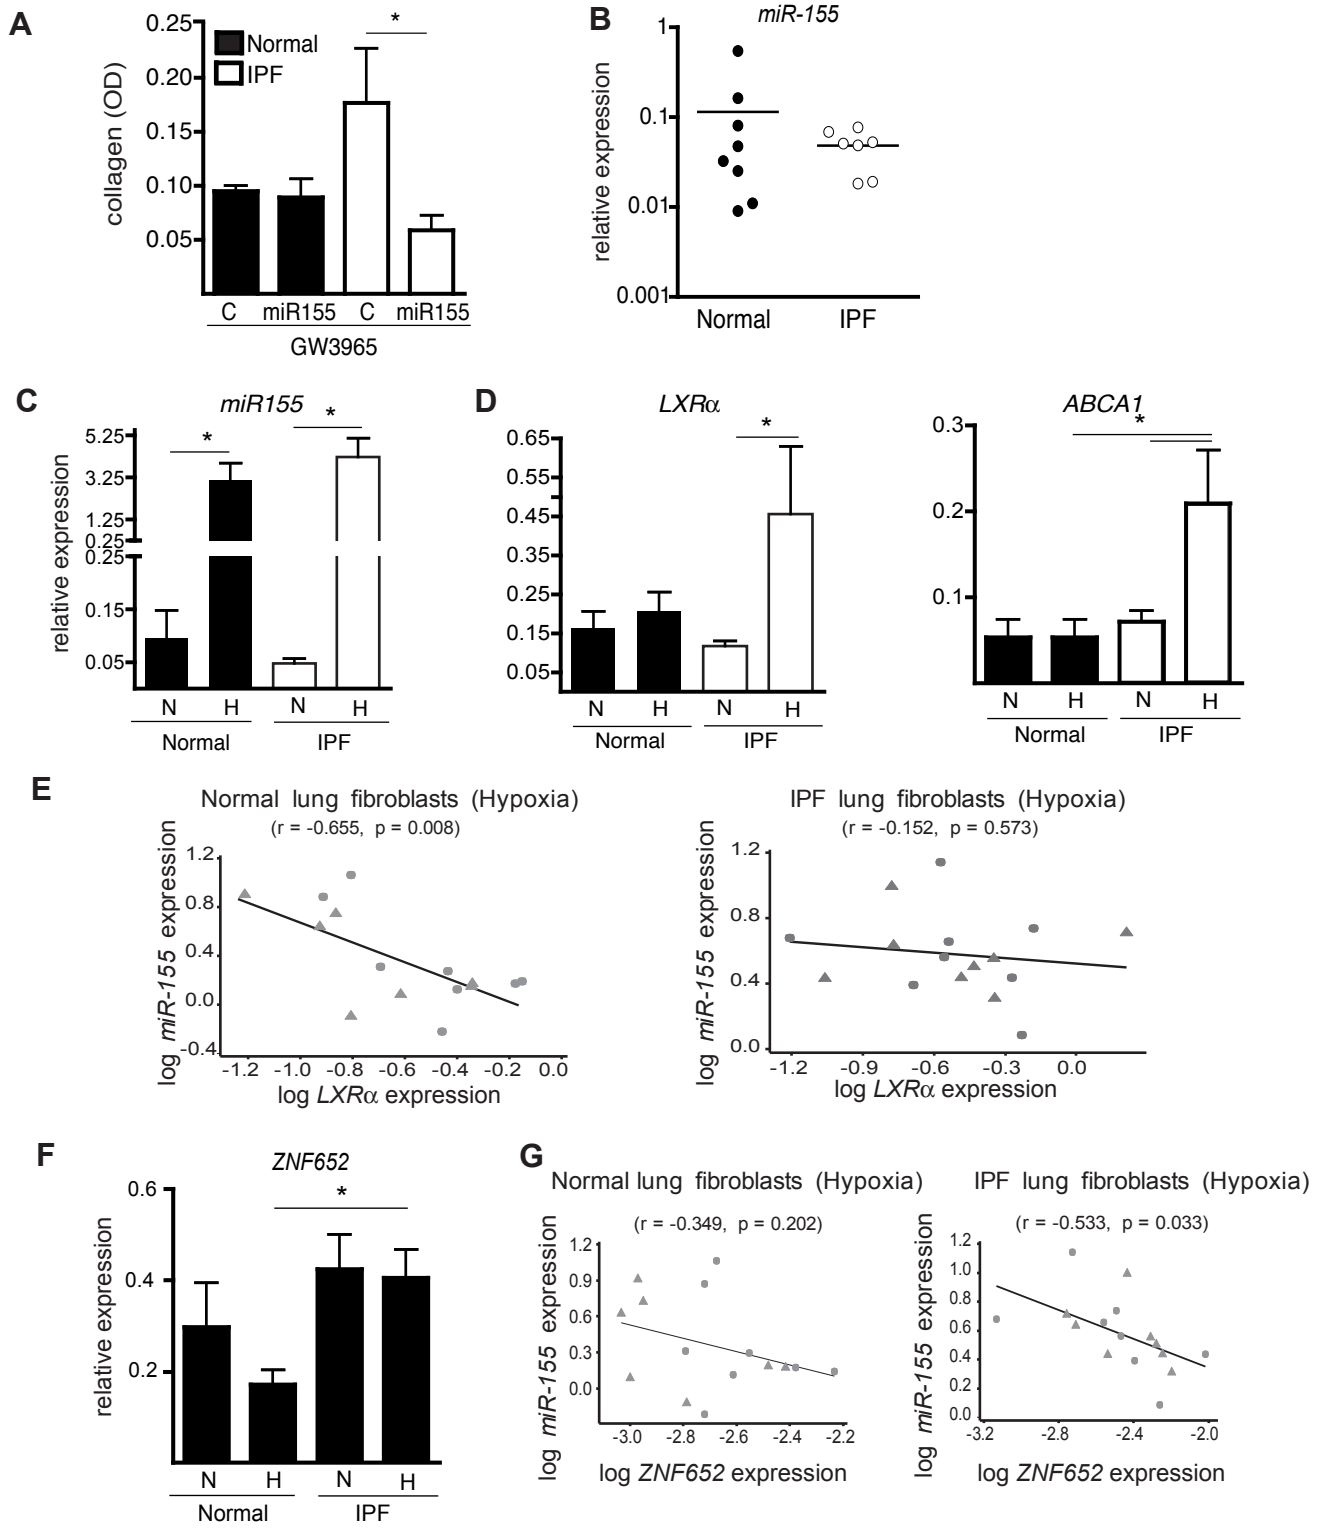

Supplement: mmc11.pdf [file mmc11.pdf]
